# Supplementary material for: Electrochemical impedance model-assisted optimization of biomass hierarchical porous carbon electrodes for supercapacitors
Source: Royal Society of Chemistry journal article supplement (doi:10.1039/d4nj05342g), 2025-01-01
Supplement: d4nj05342g1.pdf [file d4nj05342g1.pdf]

## Supplementary Information

### Electrochemical impedance model assisted optimization of biomass hierarchical porous carbon electrode for supercapacitors

Yujie Zhang,<sup>‡ab</sup> Xu Ren,<sup>‡ab</sup> Ling Liu,<sup>ab</sup> Ridong He<sup>\*ab</sup> and Yanfang Gao<sup>\*ab</sup>

<sup>a</sup> School of Chemical Engineering, Inner Mongolia University of Technology, Hohhot  
010051, P. R. China

<sup>b</sup> Engineering Research Center of Large Energy Storage Technology, Inner Mongolia University of  
Technology, Huhhot 010051, P. R. China

‡ Equal contribution.

\*Corresponding authors.

E-mail: hrd@imut.edu.cn (Ridong He), yf\_gao@imut.edu.cn (Yanfang Gao)

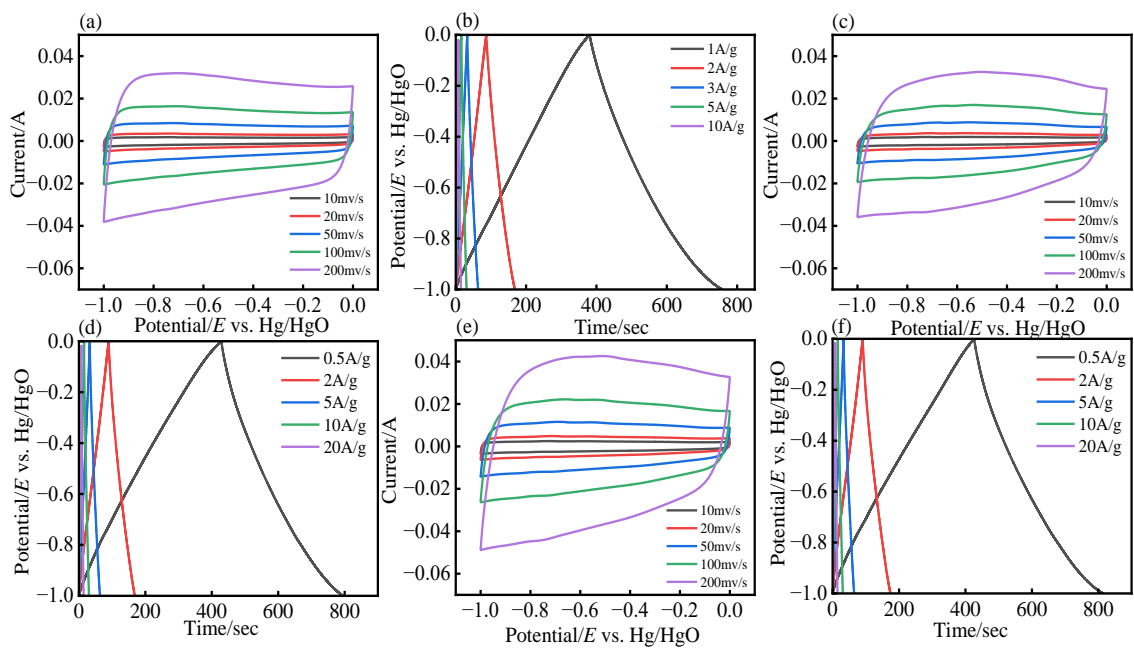

**Figure S1** Electrochemical performance of hierarchical porous carbon electrodes measured in 6.0 M KOH solution: CV and GCD curves of 1:X-PAC: (a, b) 1:0-PAC. (c, d) 1:1-PAC. (e, f) 1:2-PAC.

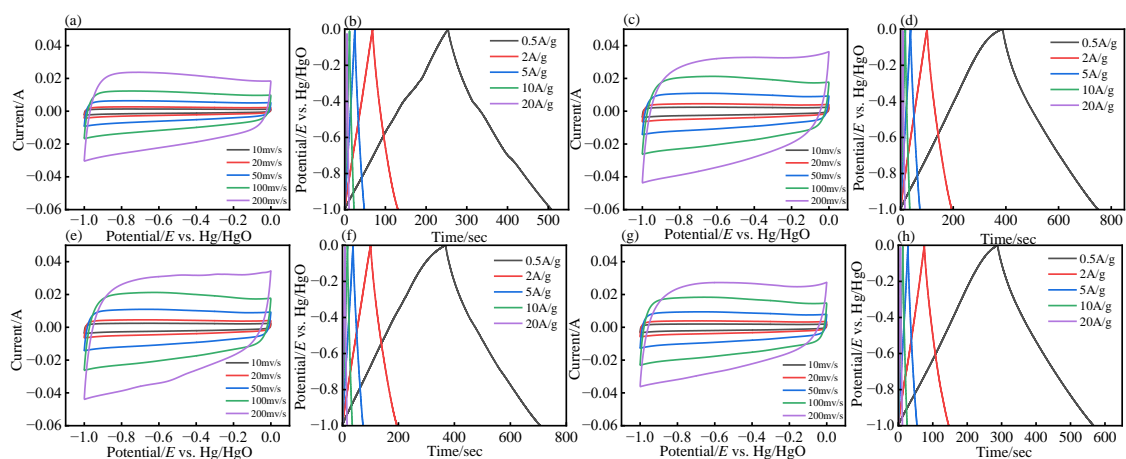

**Figure S2** Electrochemical performance of hierarchical porous carbon electrodes measured in 6.0 M KOH solution: CV and GCD curves of PAC-1:X: (a, b) PAC-1:0. (c, d) PAC-1:2. (e, f) PAC-1:3. (g, h) PAC-1:4.

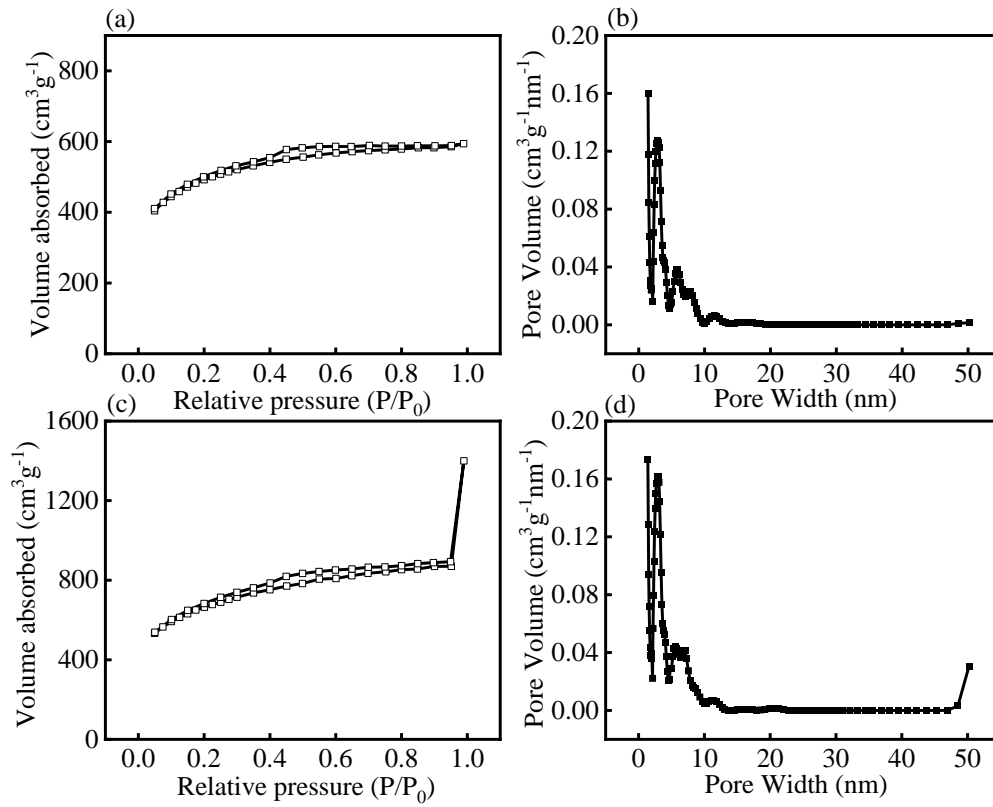

**Figure S3** Nitrogen adsorption-desorption isotherms (a), PSD curves (b) of PAC-1:1-(1), Nitrogen adsorption-desorption isotherms (c), PSD curves (d) of PAC-1:1-(3).
